# Supplementary material for: Analysis of Recent Improvement of Survival Outcomes in Patients with Pancreatic Cancer Who Underwent Upfront Surgery
Source: PubMed Central journal article supplement — Gut Liver. 2023 Dec 26;18(4):737–46. doi: 10.5009/gnl230303 (PMC11249928; doi:10.5009/gnl230303), 2023-12-26
Supplement: gnl-18-4-737-supple.pdf [file gnl-18-4-737-supple.pdf]

**Supplementary Table 1.** Univariate Cox Regression Analysis for OS

| Clinical value                                  | No. of patients | Median OS, mo | 95% CI, mo | Univariate analysis |         |
|-------------------------------------------------|-----------------|---------------|------------|---------------------|---------|
|                                                 |                 |               |            | HR (95% CI)         | p-value |
| <b>Age</b>                                      |                 |               |            |                     |         |
| ≤70 yr (Ref)                                    | 144             | 30.3          | 23.9–36.7  |                     |         |
| >70 yr                                          | 123             | 18.1          | 12.3–24.0  | 1.76 (1.34–2.32)    | <0.001  |
| <b>Sex</b>                                      |                 |               |            |                     |         |
| Female (Ref)                                    | 126             | 28.8          | 21.7–35.9  |                     |         |
| Male                                            | 141             | 24.9          | 20.0–29.8  | 1.10 (0.83–1.44)    | 0.506   |
| <b>Serum CA19-9 at diagnosis</b>                |                 |               |            |                     |         |
| <37 U/mL (Ref)                                  | 79              | 34.2          | 25.6–42.9  |                     |         |
| ≥37 U/mL                                        | 188             | 23.4          | 19.6–27.2  | 1.62 (1.18–2.23)    | 0.003   |
| <b>Resectability</b>                            |                 |               |            |                     |         |
| RPC (Ref)                                       | 232             | 28.6          | 23.9–33.2  |                     |         |
| BRPC                                            | 35              | 14.9          | 12.2–17.6  | 1.60 (1.10–2.34)    | 0.014   |
| <b>Operation type</b>                           |                 |               |            |                     |         |
| Non-PD (Ref)                                    | 106             | 29.0          | 24.5–33.5  |                     |         |
| PD                                              | 161             | 23.3          | 19.4–27.2  | 1.26 (0.95–1.67)    | 0.110   |
| <b>Surgical margins</b>                         |                 |               |            |                     |         |
| R0 (Ref)                                        | 202             | 32.2          | 27.4–36.9  |                     |         |
| R1                                              | 65              | 15.2          | 12.6–17.7  | 2.40 (1.77–3.24)    | <0.001  |
| <b>T stage*</b>                                 |                 |               |            |                     |         |
| T1 (Ref)                                        | 30              | -             | -          |                     |         |
| T2                                              | 168             | 28.6          | 22.6–34.5  | 2.60 (1.46–4.61)    | 0.001   |
| T3                                              | 69              | 16.3          | 12.3–20.4  | 5.00 (2.74–9.13)    | <0.001  |
| <b>N stage*</b>                                 |                 |               |            |                     |         |
| N0 (Ref)                                        | 81              | 44.1          | 28.7–59.5  |                     |         |
| N1                                              | 114             | 26.6          | 21.4–31.8  | 1.83 (1.29–2.59)    | 0.001   |
| N2                                              | 72              | 17.8          | 14.0–21.7  | 2.73 (1.87–3.98)    | <0.001  |
| <b>Angiolymphatic invasion</b>                  |                 |               |            |                     |         |
| No (Ref)                                        | 98              | 40.9          | 34.0–47.8  |                     |         |
| Yes                                             | 169             | 20.8          | 17.7–23.9  | 2.03 (1.50–2.74)    | <0.001  |
| <b>Perineural invasion</b>                      |                 |               |            |                     |         |
| No (Ref)                                        | 28              | 62.4          | 12.0–112.8 |                     |         |
| Yes                                             | 239             | 24.9          | 21.1–28.7  | 2.03 (1.18–3.49)    | 0.011   |
| <b>Adjuvant treatment</b>                       |                 |               |            |                     |         |
| Yes (Ref)                                       | 185             | 32.3          | 26.7–37.9  |                     |         |
| No                                              | 82              | 13.6          | 9.7–17.5   | 2.01 (1.51–2.69)    | <0.001  |
| <b>Palliative chemotherapy after recurrence</b> |                 |               |            |                     |         |
| No recurrence (Ref)                             | 64              | -             | -          |                     |         |
| FOLFIRINOX or GNP                               | 100             | 27.7          | 24.5–31.0  | 4.27 (2.60–7.00)    | <0.001  |
| Neither FOLFIRINOX nor GNP                      | 16              | 17.5          | 9.9–25.2   | 6.74 (3.42–13.3)    | <0.001  |
| Supportive care only                            | 87              | 15.6          | 11.5–19.7  | 8.21 (4.96–13.6)    | <0.001  |

OS, overall survival; HR, hazard ratio; CI, confidence interval; CA19-9, carbohydrate antigen 19-9; RPC, resectable pancreatic cancer; BRPC, borderline resectable pancreatic cancer; PD, pancreaticoduodenectomy; FOLFIRINOX, combination of 5-fluorouracil, leucovorin, irinotecan, and oxaliplatin; GNP, gemcitabine plus nab-paclitaxel.

\*T and N stages were assessed based on the 8th edition of American Joint Committee on Cancer staging system.

**Supplementary Table 2.** Univariate Cox Regression Analysis for RFS

| Clinical value                   | No. of patients | Median RFS, mo | 95% CI, mo | Univariate analysis |         |
|----------------------------------|-----------------|----------------|------------|---------------------|---------|
|                                  |                 |                |            | HR (95% CI)         | p-value |
| <b>Age</b>                       |                 |                |            |                     |         |
| ≤70 yr (Ref)                     | 144             | 13.8           | 10.6–17.0  |                     |         |
| >70 yr                           | 123             | 9.7            | 6.7–12.7   | 1.50 (1.15–1.95)    | 0.002   |
| <b>Sex</b>                       |                 |                |            |                     |         |
| Female (Ref)                     | 126             | 11.7           | 8.4–14.9   |                     |         |
| Male                             | 141             | 12.0           | 9.6–14.4   | 1.04 (0.80–1.35)    | 0.787   |
| <b>Serum CA19-9 at diagnosis</b> |                 |                |            |                     |         |
| <37 U/mL (Ref)                   | 79              | 18.8           | 13.9–23.7  |                     |         |
| ≥37 U/mL                         | 188             | 11.0           | 9.2–12.8   | 1.54 (1.14–2.07)    | 0.005   |
| <b>Resectability</b>             |                 |                |            |                     |         |
| RPC (Ref)                        | 232             | 12.8           | 10.1–15.5  |                     |         |
| BRPC                             | 35              | 7.6            | 3.5–11.7   | 1.54 (1.06–2.23)    | 0.022   |
| <b>Operation type</b>            |                 |                |            |                     |         |
| Non-PD (Ref)                     | 106             | 12.0           | 6.5–17.5   |                     |         |
| PD                               | 161             | 11.7           | 9.7–13.8   | 1.06 (0.81–1.38)    | 0.700   |
| <b>Surgical margins</b>          |                 |                |            |                     |         |
| R0 (Ref)                         | 202             | 15.8           | 12.3–19.4  |                     |         |
| R1                               | 65              | 6.7            | 5.7–7.7    | 2.73 (2.02–3.67)    | <0.001  |
| <b>T stage*</b>                  |                 |                |            |                     |         |
| T1 (Ref)                         | 30              | -              | -          |                     |         |
| T2                               | 168             | 13.5           | 10.5–16.5  | 3.08 (1.77–5.34)    | <0.001  |
| T3                               | 69              | 7.4            | 5.6–9.2    | 6.35 (3.52–11.4)    | <0.001  |
| <b>N stage*</b>                  |                 |                |            |                     |         |
| N0 (Ref)                         | 81              | 28.5           | 12.3–44.7  |                     |         |
| N1                               | 114             | 11.3           | 8.7–13.9   | 2.08 (1.49–2.92)    | <0.001  |
| N2                               | 72              | 8.3            | 5.8–10.7   | 2.99 (2.08–4.31)    | <0.001  |
| <b>Angiolymphatic invasion</b>   |                 |                |            |                     |         |
| No (Ref)                         | 98              | 24.0           | 14.7–33.3  |                     |         |
| Yes                              | 169             | 9.9            | 7.9–11.8   | 2.34 (1.75–3.12)    | <0.001  |
| <b>Perineural invasion</b>       |                 |                |            |                     |         |
| No (Ref)                         | 28              | 31.4           | -          |                     |         |
| Yes                              | 239             | 11.3           | 9.6–13.0   | 2.35 (1.39–3.97)    | 0.001   |
| <b>Adjuvant treatment</b>        |                 |                |            |                     |         |
| Yes (Ref)                        | 185             | 15.6           | 12.1–19.2  |                     |         |
| No                               | 82              | 7.0            | 5.1–8.9    | 1.84 (1.39–2.43)    | <0.001  |

RFS, recurrence-free survival; HR, hazard ratio; CI, confidence interval; CA19-9, carbohydrate antigen 19-9; RPC, resectable pancreatic cancer; BRPC, borderline resectable pancreatic cancer; PD, pancreaticoduodenectomy.

\*T and N stage were assessed based on the 8th edition of American Joint Committee on Cancer staging system.

**Supplementary Table 3.** Multivariate Cox Regression Analysis for Recurrence-Free Survival

| Clinical values                  | No. of patients | Multivariate analysis |         | Survival prediction score <sup>†</sup> |                    |
|----------------------------------|-----------------|-----------------------|---------|----------------------------------------|--------------------|
|                                  |                 | HR (95% CI)           | p-value | β coefficient                          | Score <sup>‡</sup> |
| <b>Age</b>                       |                 |                       |         |                                        |                    |
| ≤70 yr (Ref)                     | 144             |                       |         |                                        |                    |
| >70 yr                           | 123             | 1.24 (0.93–1.64)      | 0.142   |                                        |                    |
| <b>Serum CA19-9 at diagnosis</b> |                 |                       |         |                                        |                    |
| <37 U/mL (Ref)                   | 79              |                       |         |                                        |                    |
| ≥37 U/mL                         | 188             | 1.19 (0.87–1.63)      | 0.267   |                                        |                    |
| <b>Resectability</b>             |                 |                       |         |                                        |                    |
| RPC (Ref)                        | 232             |                       |         |                                        |                    |
| BRPC                             | 35              | 1.20 (0.82–1.77)      | 0.353   |                                        |                    |
| <b>Surgical margins</b>          |                 |                       |         |                                        |                    |
| R0 (Ref)                         | 202             |                       |         |                                        | 0                  |
| R1                               | 65              | 1.80 (1.31–2.49)      | <0.001  | 0.608                                  | 1                  |
| <b>T stage*</b>                  |                 |                       |         |                                        |                    |
| T1 (Ref)                         | 30              |                       |         |                                        | 0                  |
| T2                               | 168             | 1.67 (0.93–2.99)      | 0.084   | 0.645                                  | 1                  |
| T3                               | 69              | 2.86 (1.52–5.37)      | 0.001   | 1.150                                  | 2                  |
| <b>N stage*</b>                  |                 |                       |         |                                        |                    |
| N0 (Ref)                         | 81              |                       |         |                                        | 0                  |
| N1                               | 114             | 1.62 (1.11–2.36)      | 0.011   | 0.530                                  | 1                  |
| N2                               | 72              | 2.14 (1.39–3.30)      | 0.001   | 0.790                                  | 2                  |
| <b>Angiolymphatic invasion</b>   |                 |                       |         |                                        |                    |
| No (Ref)                         | 98              |                       |         |                                        | 0                  |
| Yes                              | 169             | 1.59 (1.15–2.21)      | 0.005   | 0.477 <sup>§</sup>                     | 1                  |
| <b>Perineural invasion</b>       |                 |                       |         |                                        |                    |
| No (Ref)                         | 28              |                       |         |                                        |                    |
| Yes                              | 239             | 1.55 (0.89–2.69)      | 0.123   |                                        |                    |
| <b>Adjuvant treatment</b>        |                 |                       |         |                                        |                    |
| Yes (Ref)                        | 185             |                       |         |                                        | 0                  |
| No                               | 82              | 1.96 (1.43–2.69)      | <0.001  | 0.711                                  | 1                  |

HR, hazard ratio; CI, confidence interval; CA19-9, carbohydrate antigen 19-9; RPC, resectable pancreatic cancer; BRPC, borderline resectable pancreatic cancer.

\*T and N stage were assessed based on the 8th edition of American Joint Committee on Cancer staging system; <sup>†</sup>Harrell's c-index by bootstrap validation (resampling, n=1,500)=0.709; <sup>‡</sup>The weighted scores were calculated by dividing each β coefficient by the smallest <sup>§</sup>β coefficient (0.477) and rounding to the nearest integer.

**Supplementary Table 4.** Changes in the Score of the Survival Prediction Score for Recurrence-Free Survival between Two Periods

| Survival prediction score | 2013–2015 (n=119) | 2016–2018 (n=148) | Total (n=267) | p-value |
|---------------------------|-------------------|-------------------|---------------|---------|
| Surgical margins          | 0.30±0.46         | 0.20±0.40         | 0.24±0.43     | 0.044   |
| T stage*                  | 1.24±0.60         | 1.07±0.58         | 1.15±0.59     | 0.015   |
| N stage*                  | 1.01±0.80         | 0.93±0.73         | 0.97±0.76     | 0.431   |
| Angiolymphatic invasion   | 0.62±0.49         | 0.64±0.48         | 0.63±0.48     | 0.737   |
| Adjuvant treatment        | 0.37±0.48         | 0.26±0.44         | 0.31±0.46     | 0.047   |
| Total score               | 3.55±1.74         | 3.09±1.58         | 3.30±1.67     | 0.028   |

Data are presented as mean±SD.

\*T and N stage were assessed based on the 8th edition of American Joint Committee on Cancer staging system.

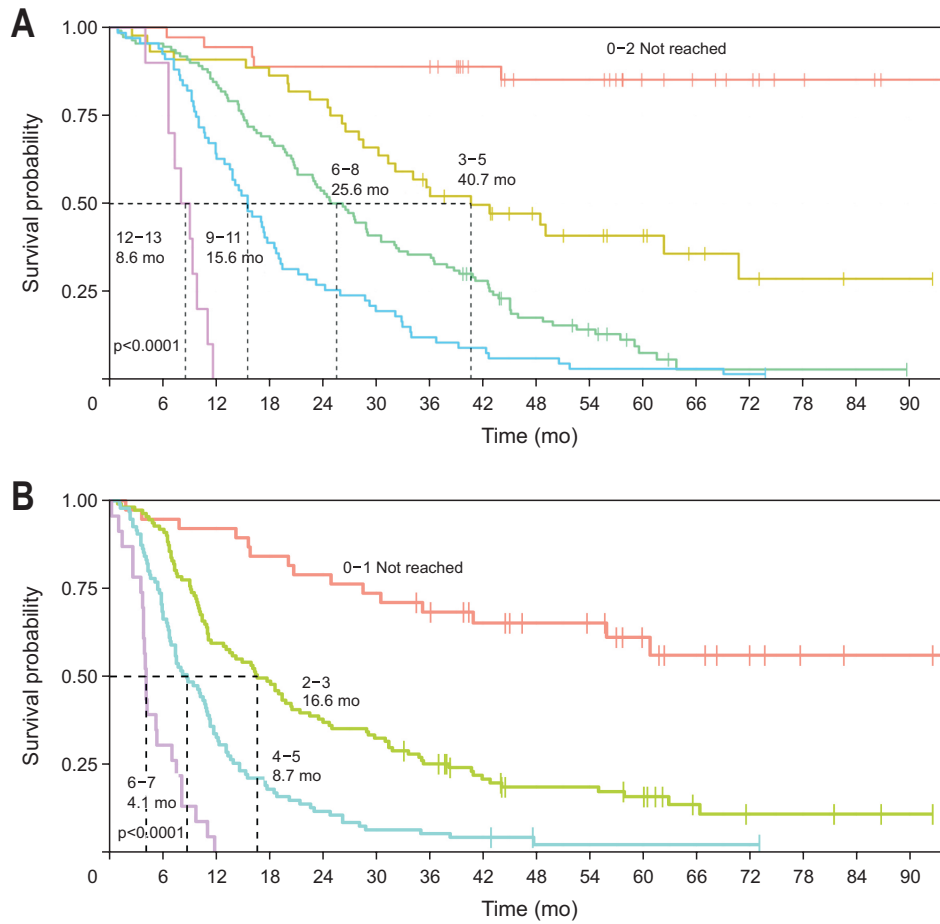

**Supplementary Fig. 1.** Survival analysis of patients with pancreatic cancer who underwent upfront surgery in terms of the subgroup according to the total survival prediction score. Kaplan-Meier survival curves for single-center data. (A) Overall survival and (B) recurrence-free survival by subgroup according to the total survival prediction score. For both log-rank tests, p-values were  $< 0.001$ .
